# Supplementary material
Source: PubMed Central journal article supplement (PMC5576212)

# Supplementary Data

## Supplementary Material

### Traumatic Brain Injury Occludes Training-Dependent Cortical Reorganization in the Contralateral Hemisphere

Contents:

1. Raw ICMS maps
  - a. Controls (untrained and unlesioned)
  - b. Traumatic brain injury (TBI) Only rats
  - c. Training Only rats
  - d. TBI+Training rats

This legend applies to all of the following maps:

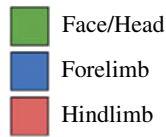

All intracortical microstimulation (ICMS) maps were conducted in the right hemisphere, which is the hemisphere ipsilateral to the trained forelimb. In each of the animals in this document, the map of ipsilateral (trained) forelimb responses is on the right, and the map of the contralateral responses is on the left.

**Control animal 1**

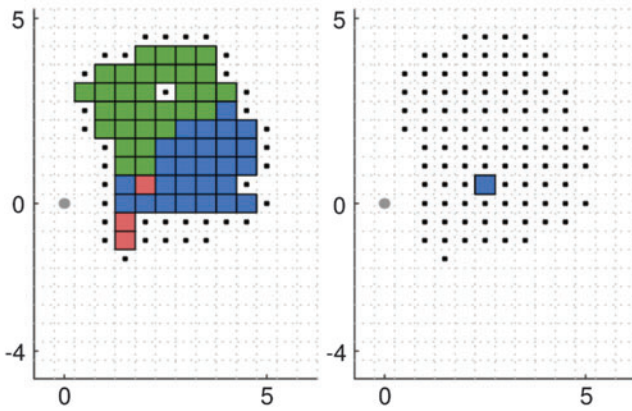

**Control animal 4**

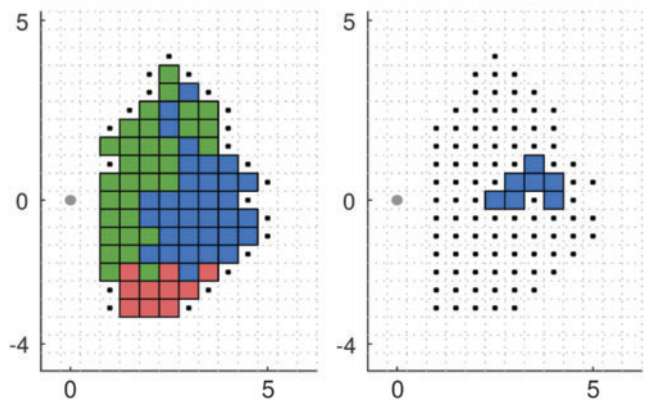

**Control animal 2**

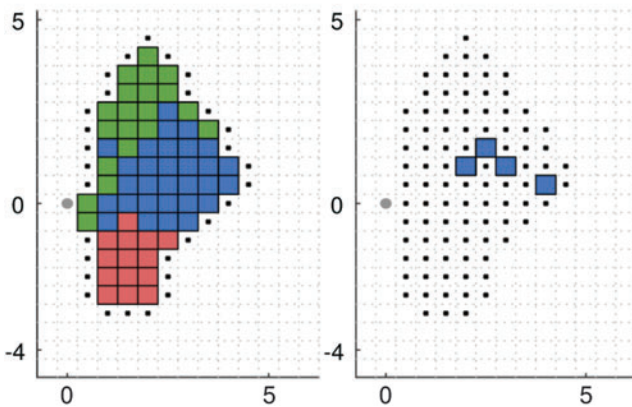

**Control animal 5**

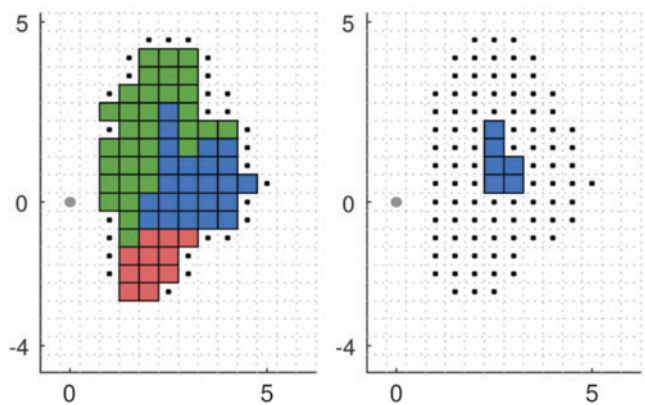

**Control animal 3**

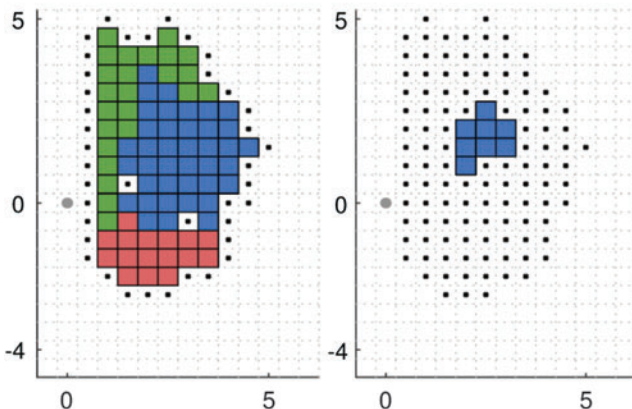

**Control animal 6**

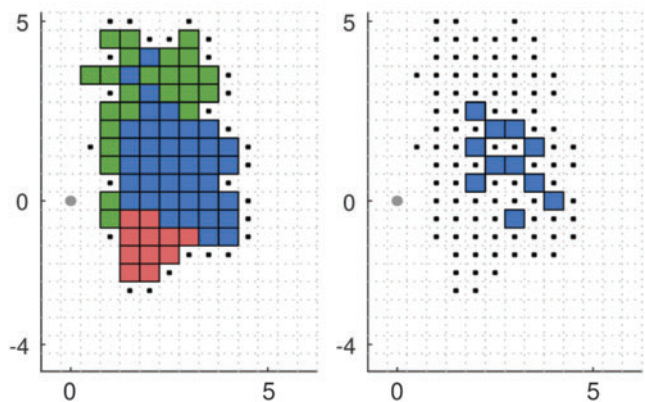

**TBI Only animal 1**

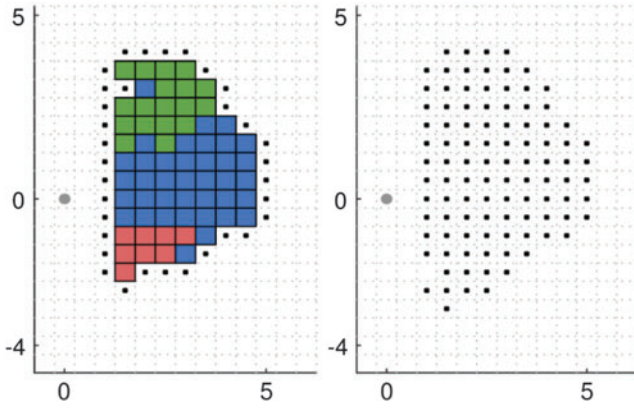

**TBI Only animal 4**

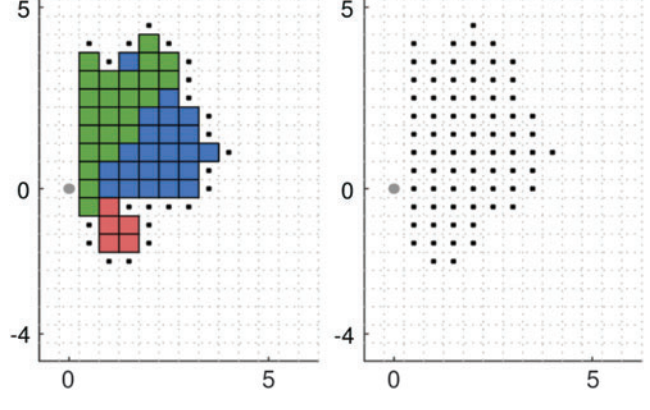

**TBI Only animal 2**

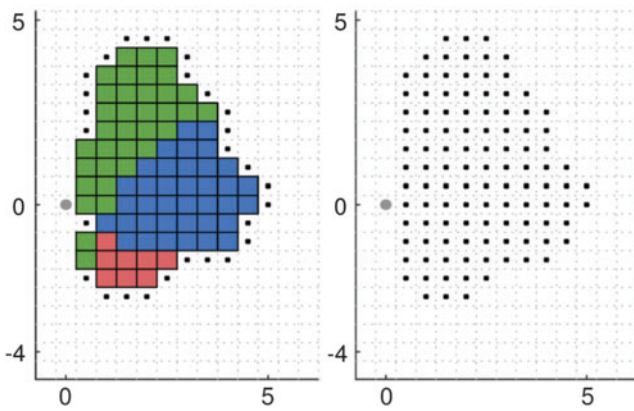

**TBI Only animal 5**

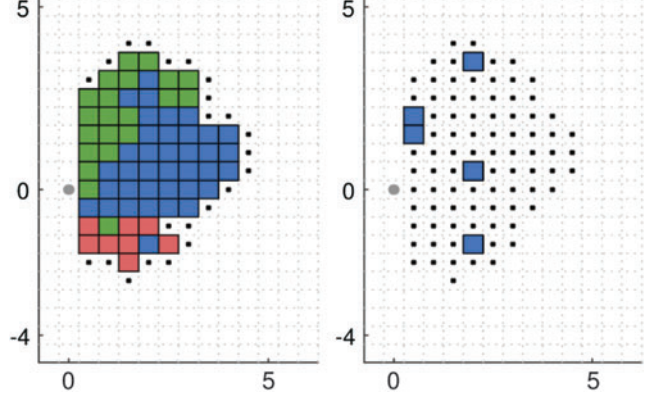

**TBI Only animal 3**

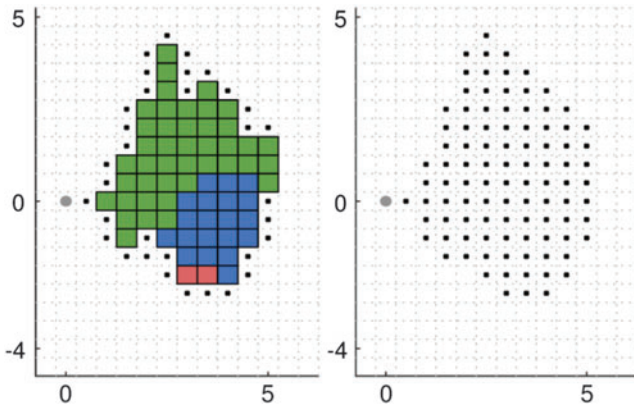

**TBI Only animal 6**

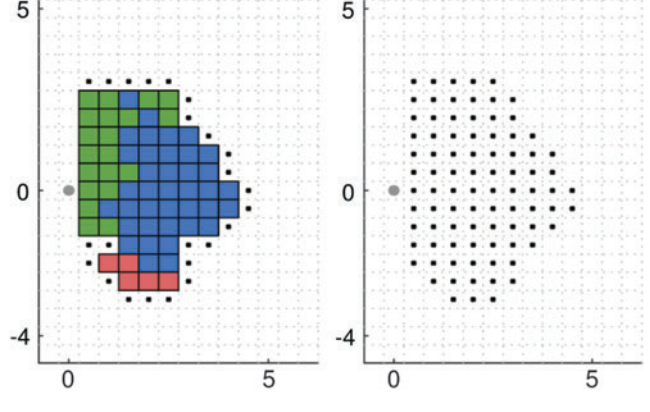

**TBI Only animal 7**

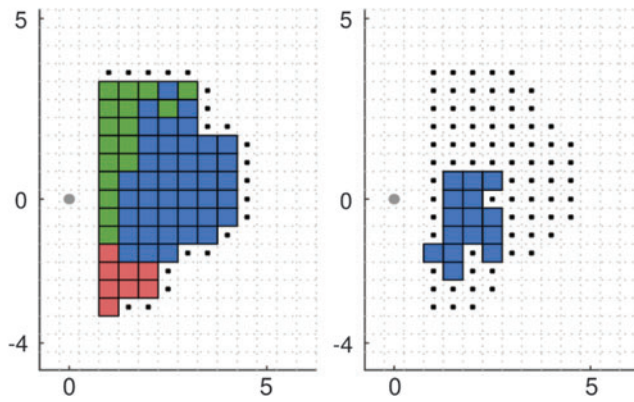

**Training Only animal 1**

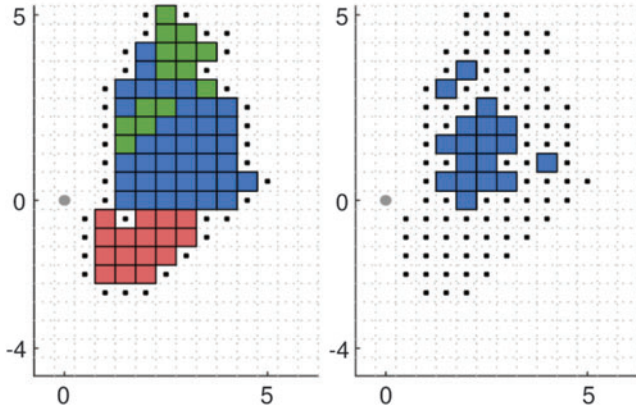

**Training Only animal 4**

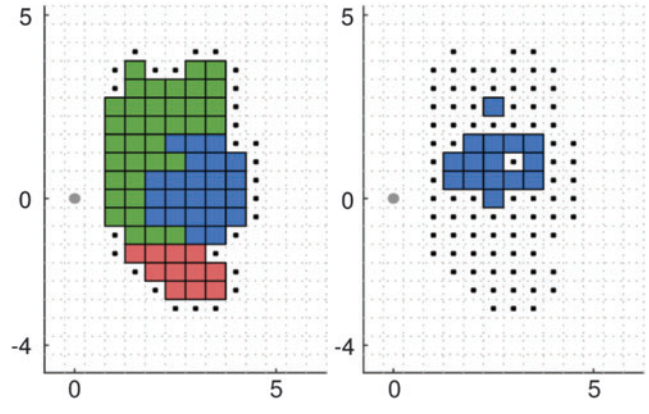

**Training Only animal 2**

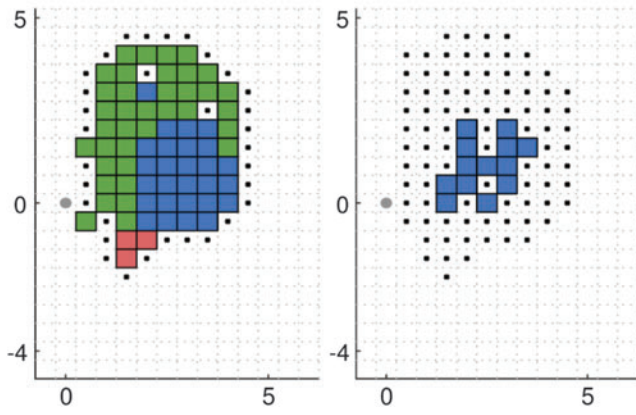

**Training Only animal 5**

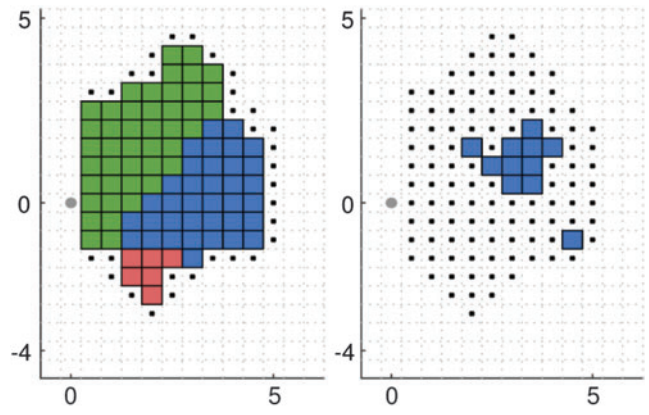

**Training Only animal 3**

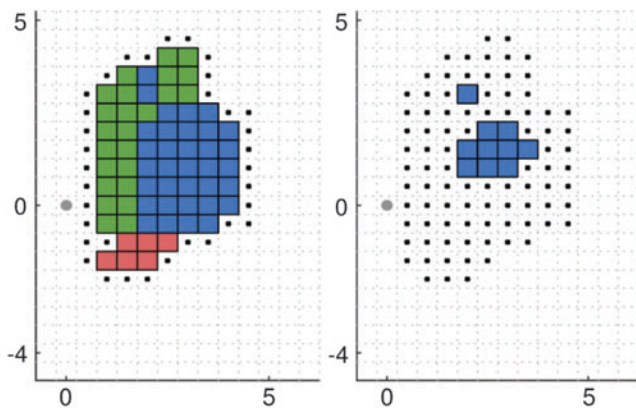

**Training Only animal 6**

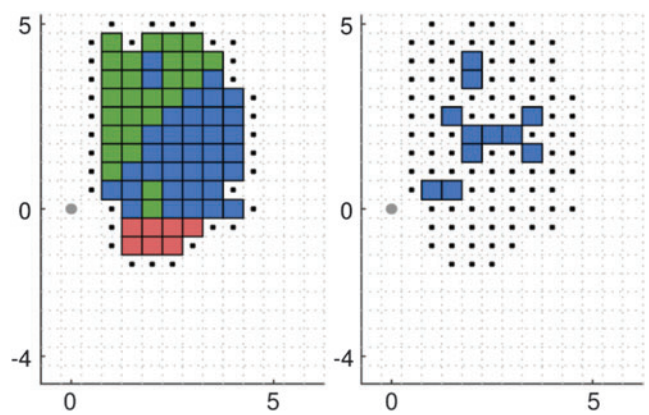

**TBI+Training animal 1**

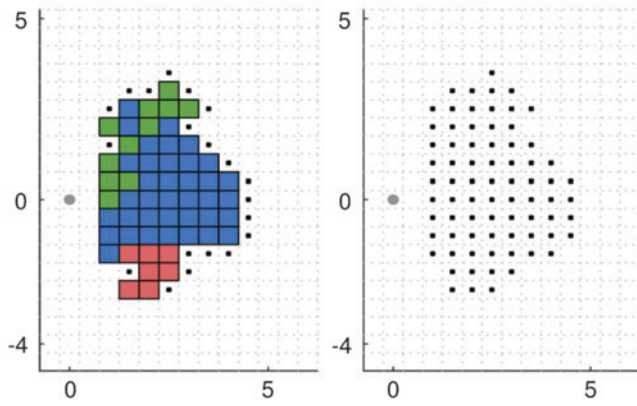

**TBI+Training animal 4**

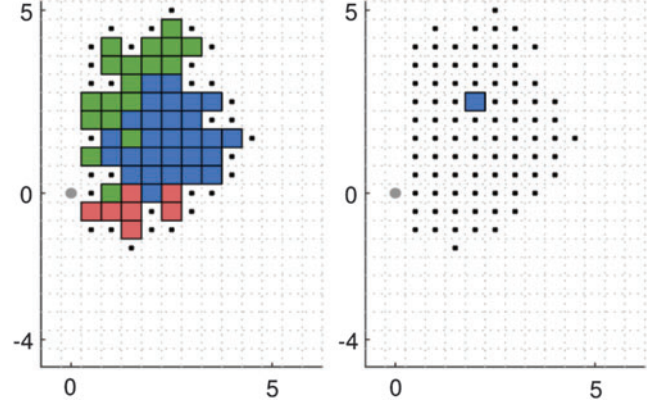

**TBI+Training animal 2**

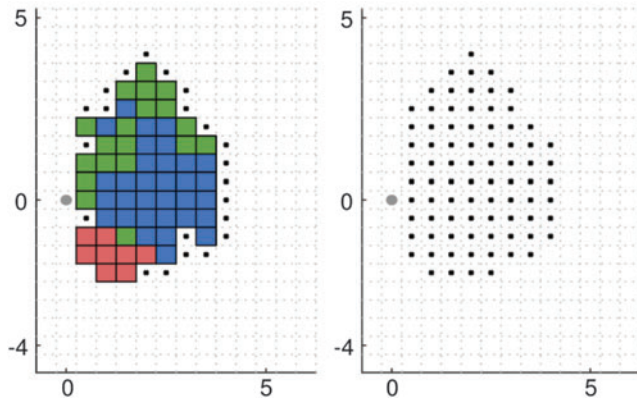

**TBI+Training animal 5**

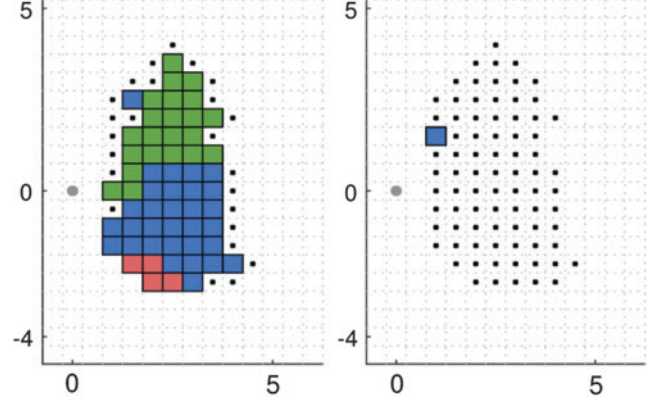

**TBI+Training animal 3**

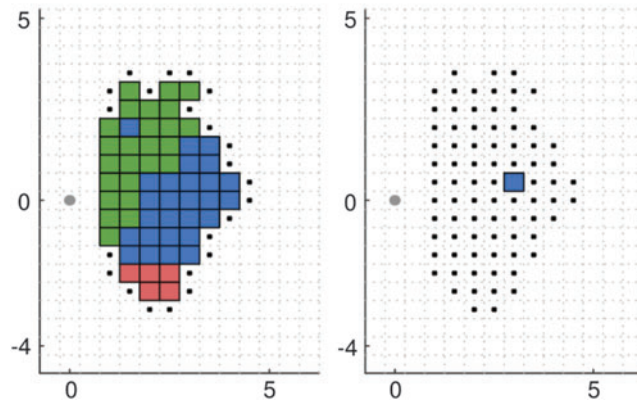

**TBI+Training animal 6**

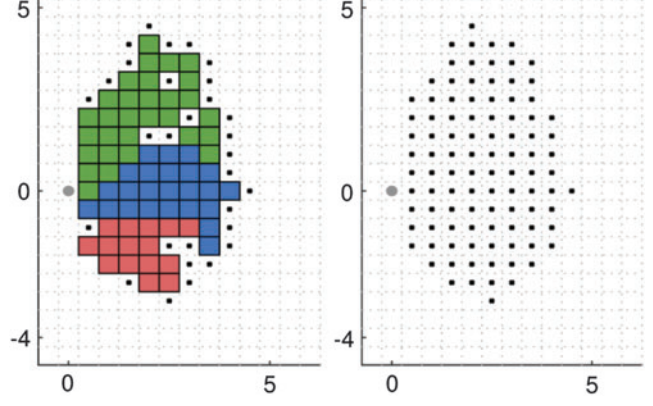

Supplement: Supp_Data.pdf [file Supp_Data.pdf]
